# Supplementary material
Source: PubMed Central journal article supplement (PMC2672512)
Supplement: 0812560106_0812560106SI.pdf [file 0812560106_0812560106SI.pdf]

# Supporting Information

Neher and Shraiman 10.1073/pnas.0812560106

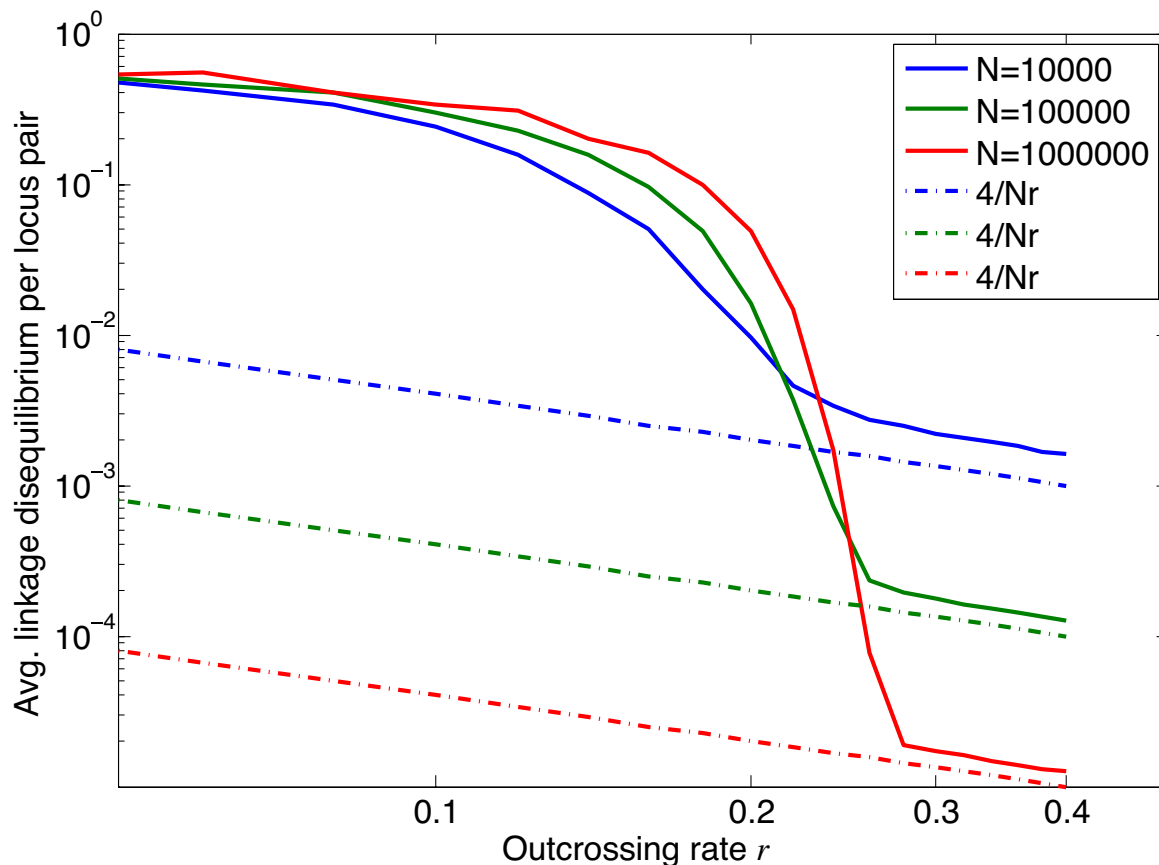

**Fig. S1.** The population size dependence of linkage disequilibrium. The plot shows the average linkage disequilibrium per locus pair  $2/L(L-1) \sum_{i < j} D_{ij}^2$  in the random epistasis model versus the outcrossing rate  $r$  for different population sizes  $N$ . Below  $r_c$ , LD does not depend strongly on  $N$ , whereas LD is proportional to  $(Nr)^{-1}$  above  $r_c$  (dashed lines). The pairwise epistasis coefficients  $f_{ij}$  in the random epistasis model are very small ( $f_{ij}^2 \sim V_i 2^{-L}$ ), such that the stochastic contribution  $(Nr)^{-1}$  dominates over the deterministic QLE prediction. Parameters:  $L = 100$ ,  $\sigma^2 = 0.005$  and  $V_A = 0.1\sigma^2$ . LD is measured when the allelic entropy decayed to 70% of its initial value. Data are averaged over 100 realizations for  $N = 10^4, 10^5$  and over 10 realizations for  $N = 10^6$ .



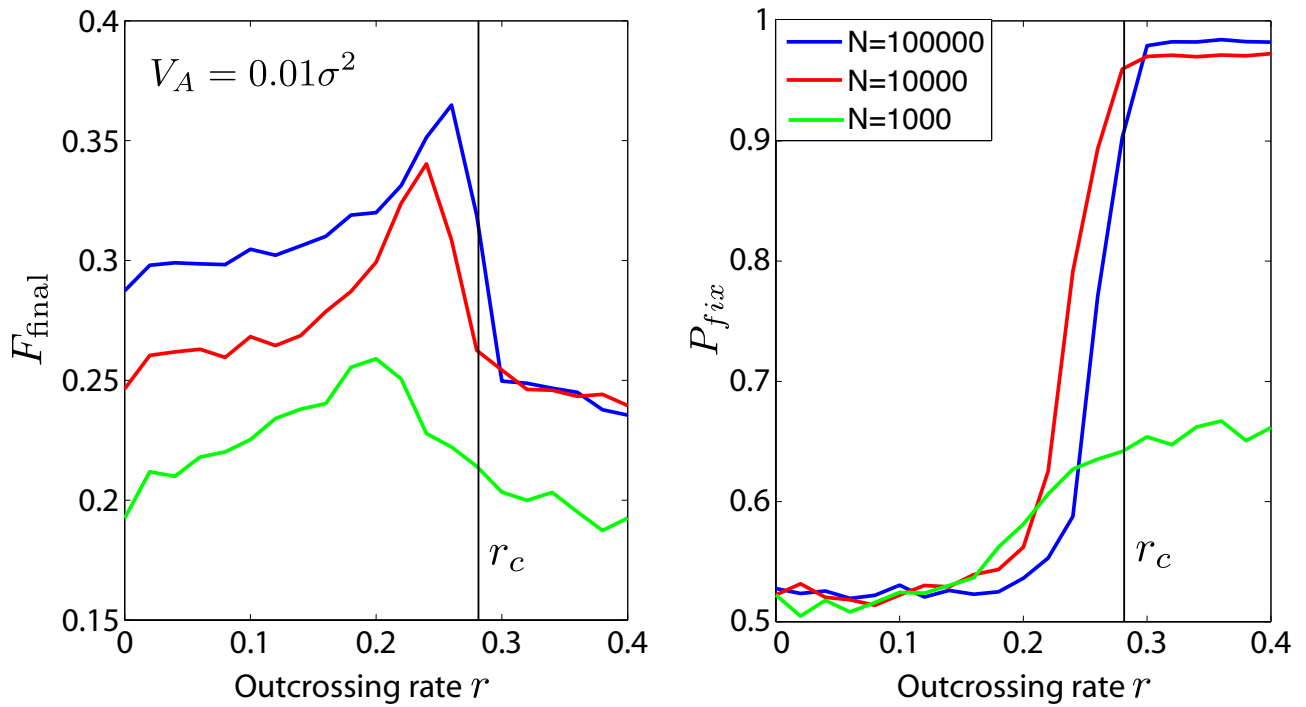

**Fig. S3.** The fitness of the fixated genotype  $F_{\text{final}}$  for  $V_A = 0.01\sigma^2$  for RE model. (a) Some of the data of Fig. 3 and the corresponding curve for the small population size  $N = 1,000$ . The additive effect per locus is  $\sqrt{V_A/L} \approx 0.0007$  and hence comparable to  $N^{-1}$  for the small population. This results in the markedly smaller fitness for  $r > r_c$  compared to larger  $N$ . The position of the peak seems to approach  $r_c$  from below as  $N$  increases, while the drop across  $r_c$  becomes steeper. More data are required to decide whether  $F_{\text{final}}$  is discontinuous at  $r = r_c$  in the limit  $L \rightarrow \infty, N \rightarrow \infty$ . (b) The probability  $P_{\text{fix}}$  that the allele with the favorable single locus effect is fixated. For large  $N$  and  $r > r_c$ , almost all loci fixate the advantageous allele ( $P_{\text{fix}}$  is close to 1). For  $N = 1,000$ , a large fraction of the loci fixates the disadvantageous allele, in accord with the above reasoning. Well below  $r_c$ ,  $P_{\text{fix}}$  deviates only slightly from 0.5 for any  $N$ , confirming that selection acts on genotypes rather than alleles. Again, the slope of  $P_{\text{fix}}$  in the transition zone is increasing with  $N$ .

## Other Supporting Information Files

[SI Appendix](#)
